# Supplementary material for: Structure, electrical conductivity and oxygen transport properties of perovskite-type oxides CaMn1−x−yTixFeyO3−δ
Source: Royal Society of Chemistry journal article supplement (doi:10.1039/c9cp04911h), 2019-01-01
Supplement: c9cp04911h1.pdf [file c9cp04911h1.pdf]

## Supplementary Information

### Structure, electrical conductivity and oxygen transport properties of perovskite-type oxides $\text{CaMn}_{1-x-y}\text{Ti}_x\text{Fe}_y\text{O}_{3-\delta}$

Rian Ruhl, Jia Song, Vincent Thoréton, Sathya Prakash Singh, Kjell Wiik, Yngve Larring, and Henny J.M.  
Bouwmeester

Table S1 Representative structural parameters for the phases of CMF. The numbers in parentheses denote standard deviations in units of the least significant digits.

| Atom                                                                           | Site | x         | y        | z         | $U_{iso}$ |
|--------------------------------------------------------------------------------|------|-----------|----------|-----------|-----------|
| 30 °C ( <i>Pnma</i> ): $a = 5.2969(1)$ Å, $b = 7.4763(2)$ Å, $c = 5.2827(1)$ Å |      |           |          |           |           |
| Ca                                                                             | 4c   | 0.0310(9) | 0.25     | -0.011(2) | 0.002(1)  |
| Mn,Fe                                                                          | 4b   | 0         | 0        | 0.5       | 0.00(3)   |
| O1                                                                             | 4c   | 0.493(2)  | 0.25     | 0.053(3)  | 0.00(1)   |
| O2                                                                             | 8d   | 0.268(4)  | 0.031(3) | 0.692(3)  | 0.038(7)  |
| 800 °C ( <i>I4/mcm</i> ): $a = b = 5.3475(3)$ Å, $c = 7.5609(7)$ Å             |      |           |          |           |           |
| Ca                                                                             | 4b   | 0         | 0.5      | 0.25      | 0.005(1)  |
| Mn,Fe                                                                          | 4c   | 0         | 0        | 0         | 0.0(2)    |
| O1                                                                             | 4a   | 0         | 0        | 0.25      | 0.00(7)   |
| O2                                                                             | 8h   | 0.221(2)  | 0.721(2) | 0         | 0.099(5)  |
| 900 °C ( <i>Pm<math>\bar{3}</math>m</i> ): $a = b = c = 3.7886(5)$ Å           |      |           |          |           |           |
| Ca                                                                             | 1a   | 0         | 0        | 0         | 0.005(1)  |
| Mn,Fe                                                                          | 1b   | 0.5       | 0.5      | 0.5       | 0.0(9)    |
| O                                                                              | 3d   | 0.5       | 0.5      | 0         | 0.058(2)  |

Note: The reliability factors for the three structural refinements are: 30 °C (*Pnma*):  $R_{wp} = 4.861\%$  and  $\chi^2 = 2.84$ ; 800 °C (*I4/mcm*):  $R_{wp} = 4.529\%$  and  $\chi^2 = 2.07$ ; 900 °C (*Pm $\bar{3}$ m*):  $R_{wp} = 4.855\%$  and  $\chi^2 = 2.93$ .

Table S2 Representative structural parameters for the phases of CMTF. The numbers in parentheses denote standard deviations in units of the least significant digits.

| Atom                                                                           | Site | x         | y        | z         | $U_{iso}$ |
|--------------------------------------------------------------------------------|------|-----------|----------|-----------|-----------|
| 30 °C ( <i>Pnma</i> ): $a = 5.3187(1)$ Å, $b = 7.5062(3)$ Å, $c = 5.3049(1)$ Å |      |           |          |           |           |
| Ca                                                                             | 4c   | 0.0274(8) | 0.25     | -0.004(3) | 0.009(1)  |
| Mn,Fe                                                                          | 4b   | 0         | 0        | 0.5       | 0.00(5)   |
| O1                                                                             | 4c   | 0.490(2)  | 0.25     | 0.066(5)  | 0.015(8)  |
| O2                                                                             | 8d   | 0.285(2)  | 0.034(2) | 0.710(3)  | 0.021(5)  |
| 800 °C ( <i>I4/mcm</i> ): $a = b = 5.3653(2)$ Å, $c = 7.58325(4)$ Å            |      |           |          |           |           |
| Ca                                                                             | 4b   | 0         | 0.5      | 0.25      | 0.010(1)  |
| Mn,Fe                                                                          | 4c   | 0         | 0        | 0         | 0.000(5)  |
| O1                                                                             | 4a   | 0         | 0        | 0.25      | 0.00(1)   |
| O2                                                                             | 8h   | 0.221(2)  | 0.721(2) | 0         | 0.081(9)  |
| 900 °C ( <i>Pm</i> $\bar{3}$ <i>m</i> ): $a = b = c = 3.7988(4)$ Å             |      |           |          |           |           |
| Ca                                                                             | 1a   | 0         | 0        | 0         | 0.003(1)  |
| Mn,Fe                                                                          | 1b   | 0.5       | 0.5      | 0.5       | 0.00(2)   |
| O                                                                              | 3d   | 0.5       | 0.5      | 0         | 0.058(2)  |

Note: The reliability factors for the three structural refinements are: 30 °C (*Pnma*):  $R_{wp} = 3.950$  % and  $\chi^2 = 2.23$ ; 800 °C (*I4/mcm*):  $R_{wp} = 3.905$ % and  $\chi^2 = 1.71$ ; 900 °C (*Pm* $\bar{3}$ *m*):  $R_{wp} = 4.416$ % and  $\chi^2 = 2.03$ .

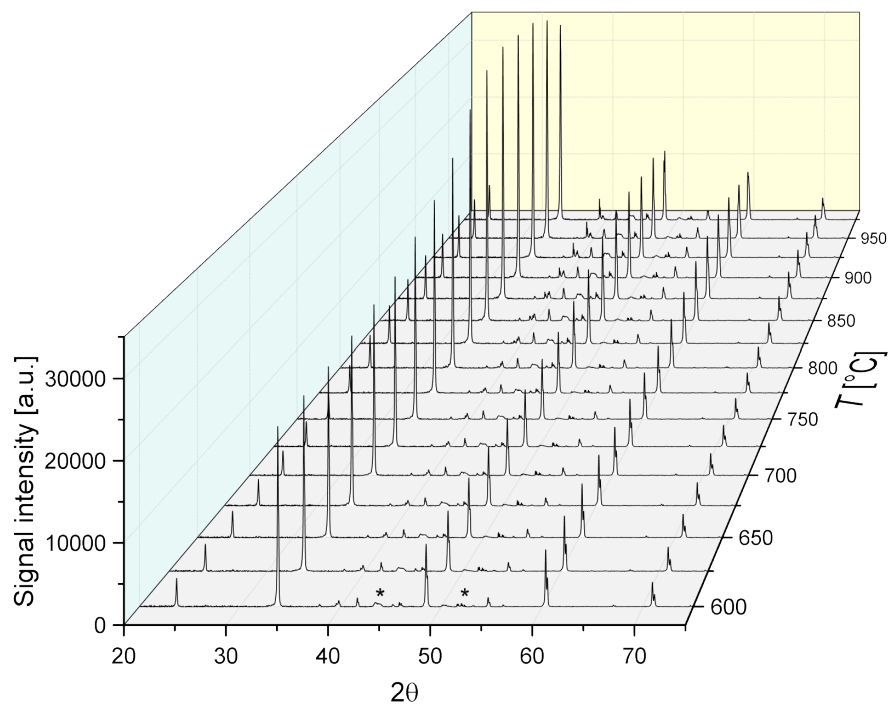

Fig. S1 HT-XRD patterns of CM recorded in air on cooling from 975 °C to 600 °C. Stars denote regions in which aberrations of the instrument are known to be present.

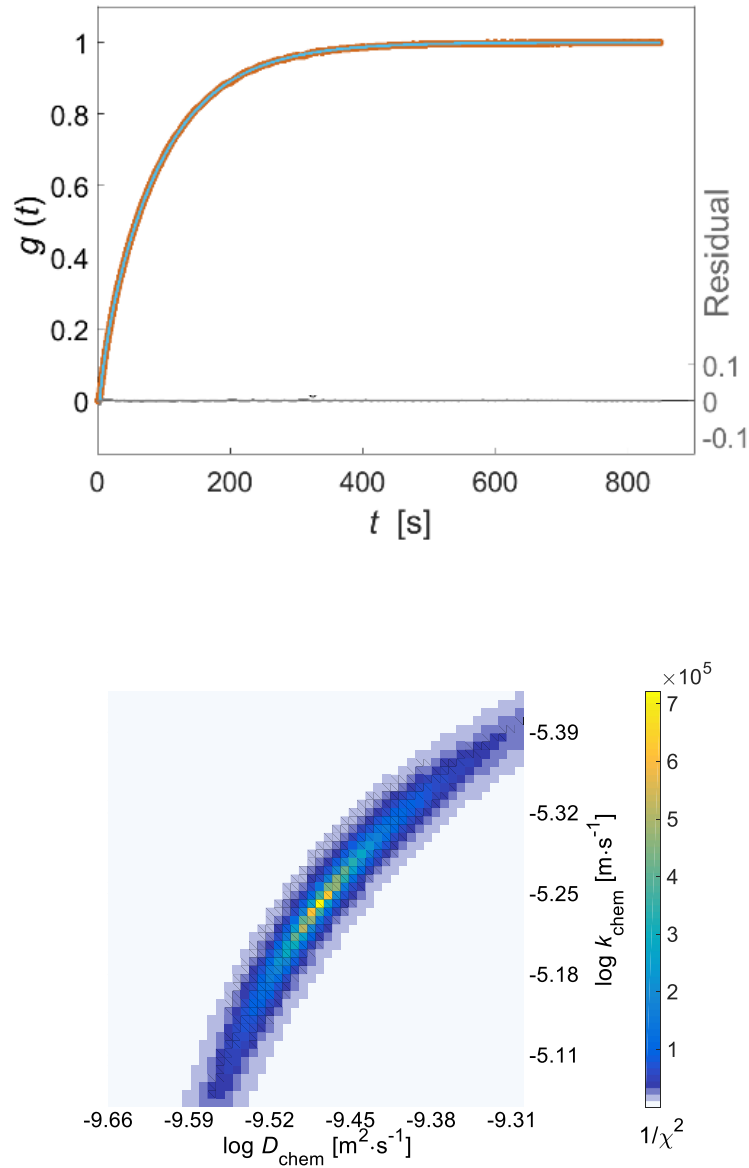

Fig. S2 (a) Normalized conductivity curve for CMF, obtained at 775 °C after a  $pO_2$  step change from 0.146 to 0.215 atm. The solid blue line represents the non-linear least squares fit to Eqs. 2-4, and the residual is shown by the grey dots. (b) Corresponding error plot, in which the most probable values for  $D_{\text{chem}}$  and  $k_{\text{chem}}$  correspond with the highest value of  $1/\chi^2$ .
